# Supplementary material for: Complete chloroplast genome sequence of Cupressus funebris and its comparative analysis among nine other Cupressaceae species
Source: Research Square preprint supplement (doi:10.21203/rs.3.rs-7974462/v1), 2025-11-13
Supplement: Supplementary file 1 [file 67e0370ebb764aa27f51b90f.xlsx]

## Sheet: Sheet1
Supplementary Table 4 The RSCU value for amino acids in the chloroplast genomes of 10 Cupressaceae species
C. funebris							C. sempervirens							C. pisifera ‘Squarrosa’							C. pisifera ‘Filifera’							C. obtusa								T. dolabrata							J. formosana
Ala	GCU	GCA	GCC	GCG			Ala	GCU	GCA	GCC	GCG			Ala	GCU	GCA	GCC	GCG			Ala	GCU	GCA	GCC	GCG			Ala	GCU	GCA	GCC	GCG				Ala	GCU	GCA	GCC	GCG			Ala	GCU	GCA	GCC	GCG
	1.94	1.22	0.49	0.34				1.94	1.22	0.48	0.36				1.95	1.23	0.48	0.34				1.94	1.24	0.48	0.34				1.96	1.23	0.49	0.32					1.93	1.22	0.51	0.34				1.94	1.24	0.47	0.36
Arg	AGA	CGU	CGA	AGG	CGC	CGG	Arg	AGA	CGU	CGA	AGG	CGC	CGG	Arg	AGA	CGU	CGA	AGG	CGC	CGG	Arg	AGA	CGU	CGA	AGG	CGC	CGG	Arg	AGA	CGU	CGA	AGG	CGC	CGG		Arg	AGA	CGU	CGA	AGG	CGC	CGG	Arg	AGA	CGU	CGA	AGG	CGC	CGG
	1.98	1.47	1.23	0.51	0.47	0.34		2.02	1.44	1.22	0.5	0.5	0.33		2	1.46	1.23	0.51	0.46	0.34		2	1.46	1.23	0.51	0.46	0.34		2	1.49	1.22	0.53	0.41	0.35			2.06	1.47	1.25	0.5	0.38	0.33		2.01	1.43	1.22	0.52	0.5	0.33
Asn	AAU	AAC					Asn	AAU	AAC					Asn	AAU	AAC					Asn	AAU	AAC					Asn	AAU	AAC						Asn	AAU	AAC					Asn	AAU	AAC
	1.57	0.43						1.57	0.43						1.57	0.43						1.58	0.42						1.57	0.43							1.56	0.44						1.57	0.43
Asp	GAU	GAC					Asp	GAU	GAC					Asp	GAU	GAC					Asp	GAU	GAC					Asp	GAU	GAC						Asp	GAU	GAC					Asp	GAU	GAC
	1.62	0.38						1.6	0.4						1.63	0.37						1.63	0.37						1.61	0.39							1.63	0.37						1.62	0.38
Cys	UGU	UGC					Cys	UGU	UGC					Cys	UGU	UGC					Cys	UGU	UGC					Cys	UGU	UGC						Cys	UGU	UGC					Cys	UGU	UGC
	1.43	0.57						1.47	0.53						1.44	0.56						1.44	0.56						1.41	0.59							1.47	0.53						1.46	0.54
End	UAA	UGA	UAG				End	UAA	UAG	UGA				End	UAA	UGA	UAG				End	UAA	UGA	UAG				End	UAA	UGA	UAG					End	UAA	UAG	UGA				End	UAA	UAG	UGA
	1.79	0.66	0.55					1.74	0.67	0.59					1.7	0.72	0.58					1.7	0.72	0.58					1.81	0.61	0.58						1.81	0.65	0.54					1.79	0.62	0.59
Gln	CAA	CAG					Gln	CAA	CAG					Gln	CAA	CAG					Gln	CAA	CAG					Gln	CAA	CAG						Gln	CAA	CAG					Gln	CAA	CAG
	1.58	0.42						1.57	0.43						1.57	0.43						1.57	0.43						1.57	0.43							1.55	0.45						1.57	0.43
Glu	GAA	GAG					Glu	GAA	GAG					Glu	GAA	GAG					Glu	GAA	GAG					Glu	GAA	GAG						Glu	GAA	GAG					Glu	GAA	GAG
	1.6	0.4						1.59	0.41						1.6	0.4						1.6	0.4						1.6	0.4							1.57	0.43						1.59	0.41
Gly	GGA	GGU	GGG	GGC			Gly	GGA	GGU	GGG	GGC			Gly	GGA	GGU	GGG	GGC			Gly	GGA	GGU	GGG	GGC			Gly	GGA	GGU	GGG	GGC				Gly	GGA	GGU	GGG	GGC			Gly	GGA	GGU	GGG	GGC
	1.67	1.44	0.5	0.39				1.71	1.42	0.48	0.39				1.67	1.47	0.49	0.37				1.67	1.47	0.49	0.37				1.67	1.47	0.49	0.37					1.72	1.42	0.47	0.38				1.7	1.44	0.48	0.39
His	CAU	CAC					His	CAU	CAC					His	CAU	CAC					His	CAU	CAC					His	CAU	CAC						His	CAU	CAC					His	CAU	CAC
	1.6	0.4						1.59	0.41						1.58	0.42						1.59	0.41						1.61	0.39							1.57	0.43						1.58	0.42
Ile	AUU	AUA	AUC				Ile	AUU	AUA	AUC				Ile	AUU	AUA	AUC				Ile	AUU	AUA	AUC				Ile	AUU	AUA	AUC					Ile	AUU	AUA	AUC				Ile	AUU	AUA	AUC
	1.51	1.04	0.45					1.49	1.03	0.48					1.49	1.02	0.48					1.49	1.03	0.48					1.5	1	0.49						1.48	1.01	0.5					1.5	1.03	0.47
Leu	UUA	UUG	CUU	CUA	CUC	CUG	Leu	UUA	UUG	CUU	CUA	CUC	CUG	Leu	UUA	CUU	UUG	CUA	CUC	CUG	Leu	UUA	CUU	UUG	CUA	CUC	CUG	Leu	UUA	CUU	UUG	CUA	CUC	CUG		Leu	UUA	UUG	CUU	CUA	CUC	CUG	Leu	UUA	UUG	CUU	CUA	CUC	CUG
	2.08	1.2	1.2	0.85	0.36	0.31		2.03	1.22	1.19	0.86	0.37	0.33		2.03	1.22	1.21	0.85	0.36	0.32		2.03	1.22	1.22	0.85	0.36	0.32		2.06	1.22	1.21	0.83	0.37	0.31			2.03	1.24	1.19	0.86	0.36	0.32		2.03	1.21	1.19	0.86	0.38	0.32
Lys	AAA	AAG					Lys	AAA	AAG					Lys	AAA	AAG					Lys	AAA	AAG					Lys	AAA	AAG						Lys	AAA	AAG					Lys	AAA	AAG
	1.54	0.46						1.52	0.48						1.54	0.46						1.54	0.46						1.55	0.45							1.55	0.45						1.52	0.48
Met	AUG						Met	AUG						Met	AUG						Met	AUG						Met	AUG							Met	AUG						Met	AUG
	1							1							1							1							1								1							1
Phe	UUU	UUC					Phe	UUU	UUC					Phe	UUU	UUC					Phe	UUU	UUC					Phe	UUU	UUC						Phe	UUU	UUC					Phe	UUU	UUC
	1.44	0.56						1.42	0.58						1.42	0.58						1.42	0.58						1.42	0.58							1.45	0.55						1.43	0.57
Pro	CCU	CCA	CCC	CCG			Pro	CCU	CCA	CCC	CCG			Pro	CCU	CCA	CCC	CCG			Pro	CCU	CCA	CCC	CCG			Pro	CCU	CCA	CCC	CCG				Pro	CCU	CCA	CCC	CCG			Pro	CCU	CCA	CCC	CCG
	1.77	1.07	0.69	0.47				1.78	1.05	0.7	0.47				1.7	1.09	0.73	0.47				1.7	1.09	0.73	0.47				1.71	1.11	0.74	0.45					1.73	1.07	0.71	0.49				1.77	1.03	0.69	0.5
Ser	UCU	AGU	UCA	UCC	UCG	AGC	Ser	UCU	AGU	UCA	UCC	UCG	AGC	Ser	UCU	UCA	AGU	UCC	UCG	AGC	Ser	UCU	UCA	AGU	UCC	UCG	AGC	Ser	UCU	AGU	UCA	UCC	UCG	AGC		Ser	UCU	AGU	UCA	UCC	UCG	AGC	Ser	UCU	UCA	AGU	UCC	UCG	AGC
	1.98	1.21	1.18	0.82	0.46	0.35		1.94	1.2	1.19	0.83	0.47	0.37		1.95	1.2	1.2	0.78	0.5	0.37		1.96	1.2	1.2	0.78	0.5	0.37		1.89	1.2	1.16	0.8	0.57	0.38			1.93	1.2	1.17	0.83	0.48	0.38		1.95	1.2	1.2	0.81	0.47	0.37
Thr	ACU	ACA	ACC	ACG			Thr	ACU	ACA	ACC	ACG			Thr	ACU	ACA	ACC	ACG			Thr	ACU	ACA	ACC	ACG			Thr	ACU	ACA	ACC	ACG				Thr	ACU	ACA	ACC	ACG			Thr	ACU	ACA	ACC	ACG
	1.76	1.14	0.63	0.46				1.79	1.13	0.64	0.45				1.75	1.19	0.63	0.43				1.75	1.19	0.63	0.43				1.75	1.21	0.63	0.42					1.77	1.18	0.63	0.42				1.74	1.16	0.65	0.44
Trp	UGG						Trp	UGG						Trp	UGG						Trp	UGG						Trp	UGG							Trp	UGG						Trp	UGG
	1							1							1							1							1								1							1
Tyr	UAU	UAC					Tyr	UAU	UAC					Tyr	UAU	UAC					Tyr	UAU	UAC					Tyr	UAU	UAC						Tyr	UAU	UAC					Tyr	UAU	UAC
	1.58	0.42						1.56	0.44						1.59	0.41						1.59	0.41						1.6	0.4							1.59	0.41						1.57	0.43
Val	GUA	GUU	GUG	GUC			Val	GUA	GUU	GUG	GUC			Val	GUA	GUU	GUG	GUC			Val	GUA	GUU	GUG	GUC			Val	GUA	GUU	GUG	GUC				Val	GUA	GUU	GUG	GUC			Val	GUA	GUU	GUG	GUC
	1.45	1.45	0.62	0.48				1.44	1.41	0.66	0.49				1.47	1.44	0.61	0.48				1.47	1.44	0.61	0.48				1.47	1.4	0.63	0.5					1.44	1.44	0.65	0.47				1.43	1.43	0.65	0.49
[truncated: 21 more columns]

## Sheet: Sheet3
Ala	1.94	1.22	0.49	0.35			4	1
Ala	1.94	1.22	0.48	0.36			4	2
Ala	1.95	1.23	0.48	0.34			4	3
Ala	1.94	1.24	0.48	0.34			4	4
Ala	1.96	1.23	0.49	0.32			4	5
Ala	1.93	1.22	0.51	0.34			4	6
Ala	1.94	1.24	0.47	0.35			4	7
Ala	1.92	1.23	0.5	0.35			4	8
Ala	1.93	1.23	0.49	0.35			4	9
Ala	1.93	1.23	0.49	0.35			4	10
Arg	1.98	1.47	1.23	0.51	0.47	0.34	6	1
Arg	2.02	1.44	1.22	0.5	0.49	0.33	6	2
Arg	2	1.46	1.23	0.51	0.46	0.34	6	3
Arg	2	1.46	1.23	0.51	0.46	0.34	6	4
Arg	2	1.49	1.22	0.53	0.41	0.35	6	5
Arg	2.06	1.47	1.25	0.51	0.38	0.33	6	6
Arg	2.01	1.43	1.22	0.51	0.5	0.33	6	7
Arg	2.02	1.43	1.21	0.5	0.5	0.34	6	8
Arg	1.94	1.5	1.27	0.51	0.47	0.31	6	9
Arg	1.94	1.49	1.26	0.52	0.46	0.33	6	10
Asn	1.57	0.43					2	1
Asn	1.57	0.43					2	2
Asn	1.57	0.43					2	3
Asn	1.58	0.42					2	4
Asn	1.57	0.43					2	5
Asn	1.56	0.44					2	6
Asn	1.57	0.43					2	7
Asn	1.56	0.44					2	8
Asn	1.57	0.43					2	9
Asn	1.57	0.43					2	10
Asp	1.62	0.38					2	1
Asp	1.6	0.4					2	2
Asp	1.63	0.37					2	3
Asp	1.63	0.37					2	4
Asp	1.61	0.39					2	5
Asp	1.63	0.37					2	6
Asp	1.62	0.38					2	7
Asp	1.61	0.39					2	8
Asp	1.62	0.38					2	9
Asp	1.62	0.38					2	10
Cys	1.43	0.57					2	1
Cys	1.47	0.53					2	2
Cys	1.44	0.56					2	3
Cys	1.44	0.56					2	4
Cys	1.41	0.59					2	5
Cys	1.47	0.53					2	6
Cys	1.46	0.54					2	7
Cys	1.43	0.57					2	8
Cys	1.45	0.55					2	9
Cys	1.45	0.55					2	10
End	1.79	0.66	0.55				3	1
End	1.74	0.67	0.59				3	2
End	1.7	0.72	0.58				3	3
End	1.7	0.72	0.58				3	4
End	1.81	0.61	0.58				3	5
End	1.81	0.65	0.54				3	6
End	1.79	0.62	0.59				3	7
End	1.85	0.61	0.54				3	8
End	1.83	0.59	0.58				3	9
End	1.83	0.59	0.58				3	10
Gln	1.58	0.42					2	1
Gln	1.57	0.43					2	2
Gln	1.57	0.43					2	3
Gln	1.57	0.43					2	4
Gln	1.57	0.43					2	5
Gln	1.55	0.45					2	6
Gln	1.57	0.43					2	7
Gln	1.56	0.44					2	8
Gln	1.57	0.43					2	9
Gln	1.57	0.43					2	10
Glu	1.6	0.4					2	1
Glu	1.59	0.41					2	2
Glu	1.6	0.4					2	3
Glu	1.6	0.4					2	4
Glu	1.6	0.4					2	5
Glu	1.57	0.43					2	6
Glu	1.59	0.41					2	7
Glu	1.59	0.41					2	8
Glu	1.61	0.39					2	9
Glu	1.61	0.39					2	10
Gly	1.67	1.44	0.5	0.39			4	1
Gly	1.71	1.42	0.48	0.39			4	2
Gly	1.67	1.47	0.49	0.37			4	3
Gly	1.67	1.47	0.49	0.37			4	4
Gly	1.67	1.47	0.49	0.37			4	5
Gly	1.72	1.42	0.47	0.39			4	6
Gly	1.7	1.44	0.47	0.39			4	7
Gly	1.69	1.46	0.47	0.38			4	8
Gly	1.67	1.45	0.5	0.38			4	9
Gly	1.67	1.45	0.5	0.38			4	10
His	1.6	0.4					2	1
His	1.59	0.41					2	2
His	1.58	0.42					2	3
His	1.59	0.41					2	4
His	1.61	0.39					2	5
His	1.57	0.43					2	6
His	1.58	0.42					2	7
His	1.63	0.37					2	8
His	1.58	0.42					2	9
His	1.58	0.42					2	10
Ile	1.51	1.04	0.45				3	1
Ile	1.49	1.03	0.48				3	2
Ile	1.49	1.03	0.48				3	3
Ile	1.49	1.03	0.48				3	4
Ile	1.5	1.01	0.49				3	5
Ile	1.48	1.02	0.5				3	6
Ile	1.5	1.03	0.47				3	7
Ile	1.5	1.03	0.47				3	8
Ile	1.51	1.03	0.46				3	9
Ile	1.51	1.03	0.46				3	10
Leu	2.08	1.2	1.2	0.85	0.36	0.31	6	1
Leu	2.03	1.22	1.19	0.86	0.37	0.33	6	2
Leu	2.03	1.22	1.21	0.85	0.36	0.33	6	3
Leu	2.03	1.22	1.22	0.85	0.36	0.32	6	4
Leu	2.06	1.22	1.21	0.83	0.37	0.31	6	5
Leu	2.03	1.24	1.19	0.86	0.36	0.32	6	6
Leu	2.03	1.21	1.19	0.86	0.38	0.33	6	7
Leu	2.08	1.22	1.19	0.85	0.33	0.33	6	8
Leu	2.07	1.24	1.19	0.85	0.35	0.3	6	9
Leu	2.07	1.23	1.19	0.85	0.36	0.3	6	10
Lys	1.54	0.46					2	1
Lys	1.52	0.48					2	2
Lys	1.54	0.46					2	3
Lys	1.54	0.46					2	4
Lys	1.55	0.45					2	5
Lys	1.55	0.45					2	6
Lys	1.52	0.48					2	7
Lys	1.55	0.45					2	8
Lys	1.55	0.45					2	9
Lys	1.55	0.45					2	10
Met	1						1	1
Met	1						1	2
Met	1						1	3
Met	1						1	4
Met	1						1	5
Met	1						1	6
Met	1						1	7
Met	1						1	8
Met	1						1	9
Met	1						1	10
Phe	1.44	0.56					2	1
Phe	1.42	0.58					2	2
Phe	1.42	0.58					2	3
Phe	1.42	0.58					2	4
Phe	1.42	0.58					2	5
Phe	1.45	0.55					2	6
Phe	1.43	0.57					2	7
Phe	1.45	0.55					2	8
Phe	1.44	0.56					2	9
Phe	1.44	0.56					2	10
Pro	1.77	1.07	0.69	0.47			4	1
Pro	1.78	1.05	0.7	0.47			4	2
Pro	1.71	1.09	0.73	0.47			4	3
Pro	1.71	1.09	0.73	0.47			4	4
Pro	1.71	1.11	0.73	0.45			4	5
Pro	1.73	1.07	0.71	0.49			4	6
Pro	1.77	1.03	0.7	0.5			4	7
Pro	1.75	1.06	0.75	0.44			4	8
Pro	1.74	1.06	0.71	0.49			4	9
Pro	1.73	1.06	0.72	0.49			4	10
Ser	1.98	1.21	1.18	0.82	0.46	0.35	6	1
Ser	1.94	1.2	1.19	0.83	0.47	0.37	6	2
Ser	1.95	1.2	1.2	0.78	0.5	0.37	6	3
Ser	1.95	1.2	1.2	0.78	0.5	0.37	6	4
Ser	1.89	1.2	1.16	0.8	0.57	0.38	6	5
Ser	1.94	1.2	1.17	0.83	0.48	0.38	6	6
Ser	1.95	1.2	1.2	0.81	0.47	0.37	6	7
Ser	1.99	1.2	1.18	0.78	0.5	0.35	6	8
Ser	1.96	1.23	1.19	0.8	0.45	0.37	6	9
Ser	1.95	1.23	1.19	0.8	0.46	0.37	6	10
Thr	1.76	1.14	0.64	0.46			4	1
Thr	1.79	1.13	0.63	0.45			4	2
Thr	1.75	1.19	0.63	0.43			4	3
Thr	1.75	1.19	0.63	0.43			4	4
Thr	1.75	1.2	0.63	0.42			4	5
Thr	1.77	1.18	0.63	0.42			4	6
Thr	1.74	1.17	0.65	0.44			4	7
Thr	1.75	1.16	0.65	0.44			4	8
Thr	1.78	1.15	0.62	0.45			4	9
Thr	1.77	1.15	0.64	0.44			4	10
Trp	1						1	1
Trp	1						1	2
Trp	1						1	3
Trp	1						1	4
Trp	1						1	5
Trp	1						1	6
Trp	1						1	7
Trp	1						1	8
Trp	1						1	9
Trp	1						1	10
Tyr	1.58	0.42					2	1
Tyr	1.56	0.44					2	2
Tyr	1.59	0.41					2	3
Tyr	1.59	0.41					2	4
Tyr	1.6	0.4					2	5
Tyr	1.59	0.41					2	6
Tyr	1.57	0.43					2	7
Tyr	1.59	0.41					2	8
Tyr	1.57	0.43					2	9
Tyr	1.58	0.42					2	10
Val	1.45	1.45	0.62	0.48			4	1
Val	1.44	1.41	0.66	0.49			4	2
Val	1.47	1.44	0.61	0.48			4	3
Val	1.47	1.44	0.61	0.48			4	4
Val	1.47	1.4	0.63	0.5			4	5
Val	1.44	1.44	0.65	0.47			4	6
Val	1.43	1.43	0.65	0.49			4	7
Val	1.48	1.44	0.59	0.49			4	8
Val	1.44	1.44	0.64	0.48			4	9
Val	1.45	1.44	0.63	0.48			4	10
