# Supplementary material for: Complete chloroplast genome sequence of Cupressus funebris and its comparative analysis among nine other Cupressaceae species
Source: Research Square preprint supplement (doi:10.21203/rs.3.rs-7974462/v1), 2025-11-13
Supplement: Supplementary file 2 [file 7b5174068522320e888d6510.xlsx]

## Sheet: Sheet1
Supplementary Table 3 The accession number of the complete chloroplast genome sequences and annotation information for all ten species
Accession number	Species
PX355009	Chamaecyparis pisifera ‘Squarrosa’
PX355010	Chamaecyparis pisifera ‘Filifera’
PX355011	Chamaecyparis obtusa
PX355012	Juniperus formosana
PX355013	Platycladus orientalis ‘Sieboldii’
PX355014	Hesperocyparis arizonica
PX355015	Hesperocyparis lusitanica
PX355016	Thujopsis dolabrata
PX355017	Cupressus sempervirens
PX355018	Cupressus funebris
