# Supplementary material for: Complete chloroplast genome sequence of Cupressus funebris and its comparative analysis among nine other Cupressaceae species
Source: Research Square preprint supplement (doi:10.21203/rs.3.rs-7974462/v1), 2025-11-13
Supplement: Supplementary file 3 [file 9172290aa1aae8712e4d6c74.docx]

**Supplementary Table 1** Collection Sites of the 10 Cupressaceae Species

| Collection Sites | Species | Accession Number | Botanist |
| --- | --- | --- | --- |
| Hangzhou Botanical Garden, Hangzhou, Zhejiang, China | *Chamaecyparis pisifera 'Squarrosa'* Ohwi | HZ000301 | Xiangqun Qiu |
| *Chamaecyparis pisifera 'Filifera'* Dallimore and Jackson | HZ000302 | Xiangqun Qiu |
| *Chamaecyparis obtusa* (Siebold & Zucc.) Endl. | HZ000290 | S.Y. Chang |
| *Juniperus formosana* Hayata | HZ000310 | S.Y. Chang |
| *Platycladus orientalis 'Sieboldii'* Dallimore and Jackson | HZ000407 | S.Y. Chang |
| *Hesperocyparis arizonica* (Greene) Bartel | HZ000330 | S.Y. Chang |
| Shanghai Botanical Garden, Shanghai, China | *Hesperocyparis lusitanica* (Mill.) Bartel | CRG8-002 | Junzhe Gu |
| *Thujopsis dolabrata* (L. f.) Siebold & Zucc. | CRG22-1-118 | Junzhe Gu |
| *Cupressus sempervirens* L. | CRG6-040 | Junzhe Gu |
| *Cupressus funebris* Endl. | CRG5-001 | Junzhe Gu |

**Supplementary Table 2** NCBI Accession Number of 53 Published Chloroplast Genomes from Cupressaceae Species

| Genus | Name of Species | NCBI |
| --- | --- | --- |
| *Cupressus* L. | *Cupressus duclouxiana* Hickel | NC_065031.1 |
| *Cupressus gigantea* W. C. Cheng & L. K. Fu | NC_028155.1 |
| *Cupressus chengiana* S. Y. Hu | NC_034788.1 |
| *Sequoia* Endl. | *Sequoia sempervirens* (D. Don) Endl. | NC_030372.1 |
| *Chamaecyparis* Spach | *Chamaecyparis formosensis* Matsum. | NC_034943.1 |
| *Chamaecyparis pisifera* (Siebold & Zucc.) Endl. | NC_057503.1 |
| *Chamaecyparis hodginsii* (Dunn) Rushforth | NC_036996.1 |
| *Chamaecyparis lawsoniana* (A. Murray bis) Parl. | KX832622.1 |
| *Platycladus* Spach | *Platycladus orientalis* (L.) Franco | KX832626.1 |
| *Juniperus* L. | *Juniperus rigida* Siebold & Zucc. | NC_062083.1 |
| *Juniperus communis* L. | NC_035068.1 |
| *Juniperus virginian*a L. | NC_024024.1 |
| *Juniperus sabina* L. | NC_039644.1 |
| *Juniperus recurva* Buch.-Ham. ex D. Don | NC_042763.1 |
| *Juniperus pingii* W. C. Cheng ex Ferré | NC_065034.1 |
| *Juniperus tibetica* Kom. | NC_041523.1 |
| *Juniperus squamata* Buch.-Ham. ex D. Don | NC_044076.1 |
| *Juniperus semiglobosa* Regel | NC_077614.1 |
| *Juniperus gaussenii* W. C. Cheng | NC_065033.1 |
| *Juniperus procumbens* (Siebold ex Endl.) Miq. | NC_065035.1 |
| *Juniperus przewalskii* Kom. | NC_062328.1 |
| *Juniperus microsperma* (W. C. Cheng & L. K. Fu) R. P. Adams | NC_037430.1 |
| *Juniperus pseudosabina* Fisch. & C. A. Mey. | NC_077615.1 |
| *Juniperus chinensis* L. | NC_065032.1 |
| *Juniperus bermudiana* L. | NC_024021.1 |
| *Juniperus monosperma* (Engelm.) Sarg. | NC_024022.1 |
| *Juniperus saltuaria* Rehder & E. H. Wilson | MT133566.1 |
| *Juniperus cedrus* Webb & Berthel. | NC_028190.1 |
| *Juniperus coxii* A. B. Jacks. | OR086071.1 |
| *Juniperus scopulorum* Sarg. | NC_024023.1 |
| *Juniperus osteosperma* (Torr.) Little | NC_068784.1 |
| *Calocedrus* Kurz | *Calocedrus decurrens* (Torr.) Florin | NC_045867.1 |
| *Calocedrus macrolepis* Kurz | KX832621.1 |
| *Calocedrus formosana* (Florin) Florin | NC_023121.1 |
| *Calocedrus rupestris* Aver., T. H. Nguyên & P. K. Lôc | NC_047223.1 |
| *Xanthocyparis* | *Xanthocyparis vietnamensis* Farjon & T. H. Nguyên | KX832629.1 |
| *Sequoiadendron* | *Sequoiadendron giganteum* (Lindl.) J. Buchholz | MW470993.1 |
| *Cryptomeria* D. Don | Cryptomeria japonica (Thunb. ex L. f.) D. Don | NC_010548.1 |
| *Taxodium* Rich. | *Taxodium distichum* (L.) Rich. | NC_034941.1 |
| *Taxodium mucronatum* Ten. | NC_045277.1 |
| *Hesperocyparis* | *Hesperocyparis macrocarpa* (Hartw.) Bartel | PQ822239.1 |
| *Hesperocyparis glabra* (Sudw.) Bartel | KX832624.1 |
| *Hesperocyparis stephensonii* (C. B. Wolf) Bartel | NC_061008.1 |
| *Cunninghamia* | *Cunninghamia lanceolata* (Lamb.) Hook | NC_021437.1 |
| *Cunninghamia konishii* Hayata | LC571741.1 |
| *Metasequoia* | *Metasequoia glyptostroboides* Hu & W. C. Cheng | NC_027423.1 |
| *Glyptostrobus* | *Glyptostrobus pensilis* (Staunton ex D. Don) K. Koch | NC_031354.1 |
| *Taiwania* Hayata | *Taiwania cryptomerioides* Hayata | NC_016065.1 |
| *Thuja* L. | *Thuja plicata* Donn ex D. Don | NC_042175.1 |
| *Thuja occidentali*s L. | NC_042177.1 |
| *Thuja koraiensis* Nakai | NC_048527.1 |
| *Thuja standishii* (Gordon) Carrière | NC_084164.1 |
| *Thuja sutchuenensis* Franch. | NC_042176.1 |
