# Supplementary material for: Complete chloroplast genome sequence of Cupressus funebris and its comparative analysis among nine other Cupressaceae species
Source: Research Square preprint supplement (doi:10.21203/rs.3.rs-7974462/v1), 2025-11-13
Supplement: Supplementary file 4 [file c99064a2a47b85b1aa880162.xlsx]

## Sheet: Sheet1
Supplementary Table 5 The number of five species of long repeats
Species	Tandem	Palindromic	Forward	Reverse	Complementary	Total
C. funebris	53	28	151	12	8	252
C. sempervirens	72	22	195	6	2	297
C. pisifera ‘Squarrosa’	51	66	217	156	31	521
C. pisifera ‘Filifera’	58	104	231	174	67	634
C. obtusa	56	121	364	147	87	775
T. dolabrata	82	32	288	2	0	404
J. formosana	81	47	225	86	31	470
P. orientalis ‘Sieboldii’	73	17	133	24	0	247
H. arizonica	54	16	203	1	1	275
H. lusitanica	43	20	221	5	2	291
Total	623	473	2228	613	229	4166
